# Supplementary material
Source: PubMed Central journal article supplement (PMC3243737)

## SUPPLEMENTARY TABLES AND FIGURES

| <b>Table S1</b> PCR amplification primers. |        |                            | Annealing Temp. |
|--------------------------------------------|--------|----------------------------|-----------------|
| Cyt <i>b</i>                               | CytBa  | GATATGAAAAACCATCGTTG       | 50C             |
|                                            | CytBj  | CTGCAGTCATCTCCGGTTTACAAGAC |                 |
| Anon                                       | Anon1F | CTGCGCAGCCCTGACATATGG      | 53C             |
|                                            | Anon2R | GAAGATGGGATCCAGCTCCAGC     |                 |
| ACR                                        | ACR11F | TATGGTRGAGATGCTGCCAACTG    | 53C             |
|                                            | ACR15R | GCAGTGAGCAGCTGTAAGCACC     |                 |
| ZAN                                        | ZAN19F | CCGCTTCTCAGGGAAATGCACC     | 52C             |
|                                            | ZAN20R | AGGAGGACCCCAAGACTCC        |                 |
| Zp2                                        | ZP23F  | GATCAATGCAGAAGCAGCAAATGG   | 51C             |
|                                            | ZP24R  | GTGACTCACAGAGACACTCAGG     |                 |

Internal sequencing primers for long fragments available upon request

**Table S2** Models of sequence evolution

---

*Cyt b*

---

|               |           |
|---------------|-----------|
| All           | HKY+I+G   |
| Position 1    | TrN+G     |
| Position 2    | TrNef+I+G |
| Positions 1/2 | HKY+I+G   |
| Position 3    | TIM+I     |

---

Nuclear

---

|                     |            |
|---------------------|------------|
| Anon                | K2P+I+G    |
| ACR                 | HKY+G      |
| ZAN                 | K2P+G      |
| Zp2                 | TrN+I+G    |
| <i>concatenated</i> | K2P+I+G    |
| <i>gaps</i>         | MrBayes Mk |

---

(Selected by DT ModSel)

|

**Table S3. Maximum Likelihood estimates of  $\theta$**

| <b>Species</b>        | <b>min</b> | <b>MLE</b> | <b>max</b> |
|-----------------------|------------|------------|------------|
| <i>cinereicollis</i>  | 0.002334   | 0.003358   | 0.005028   |
| <i>minimus</i>        | 0.009737   | 0.012119   | 0.015207   |
| <i>quadrivitattus</i> | 0.000363   | 0.000796   | 0.001482   |
| <i>ruficaudus</i>     | 0.000625   | 0.001156   | 0.001844   |

Produced using LAMARC. Min and max are 95% confidence bounds. MLE is the maximum likelihood estimate.

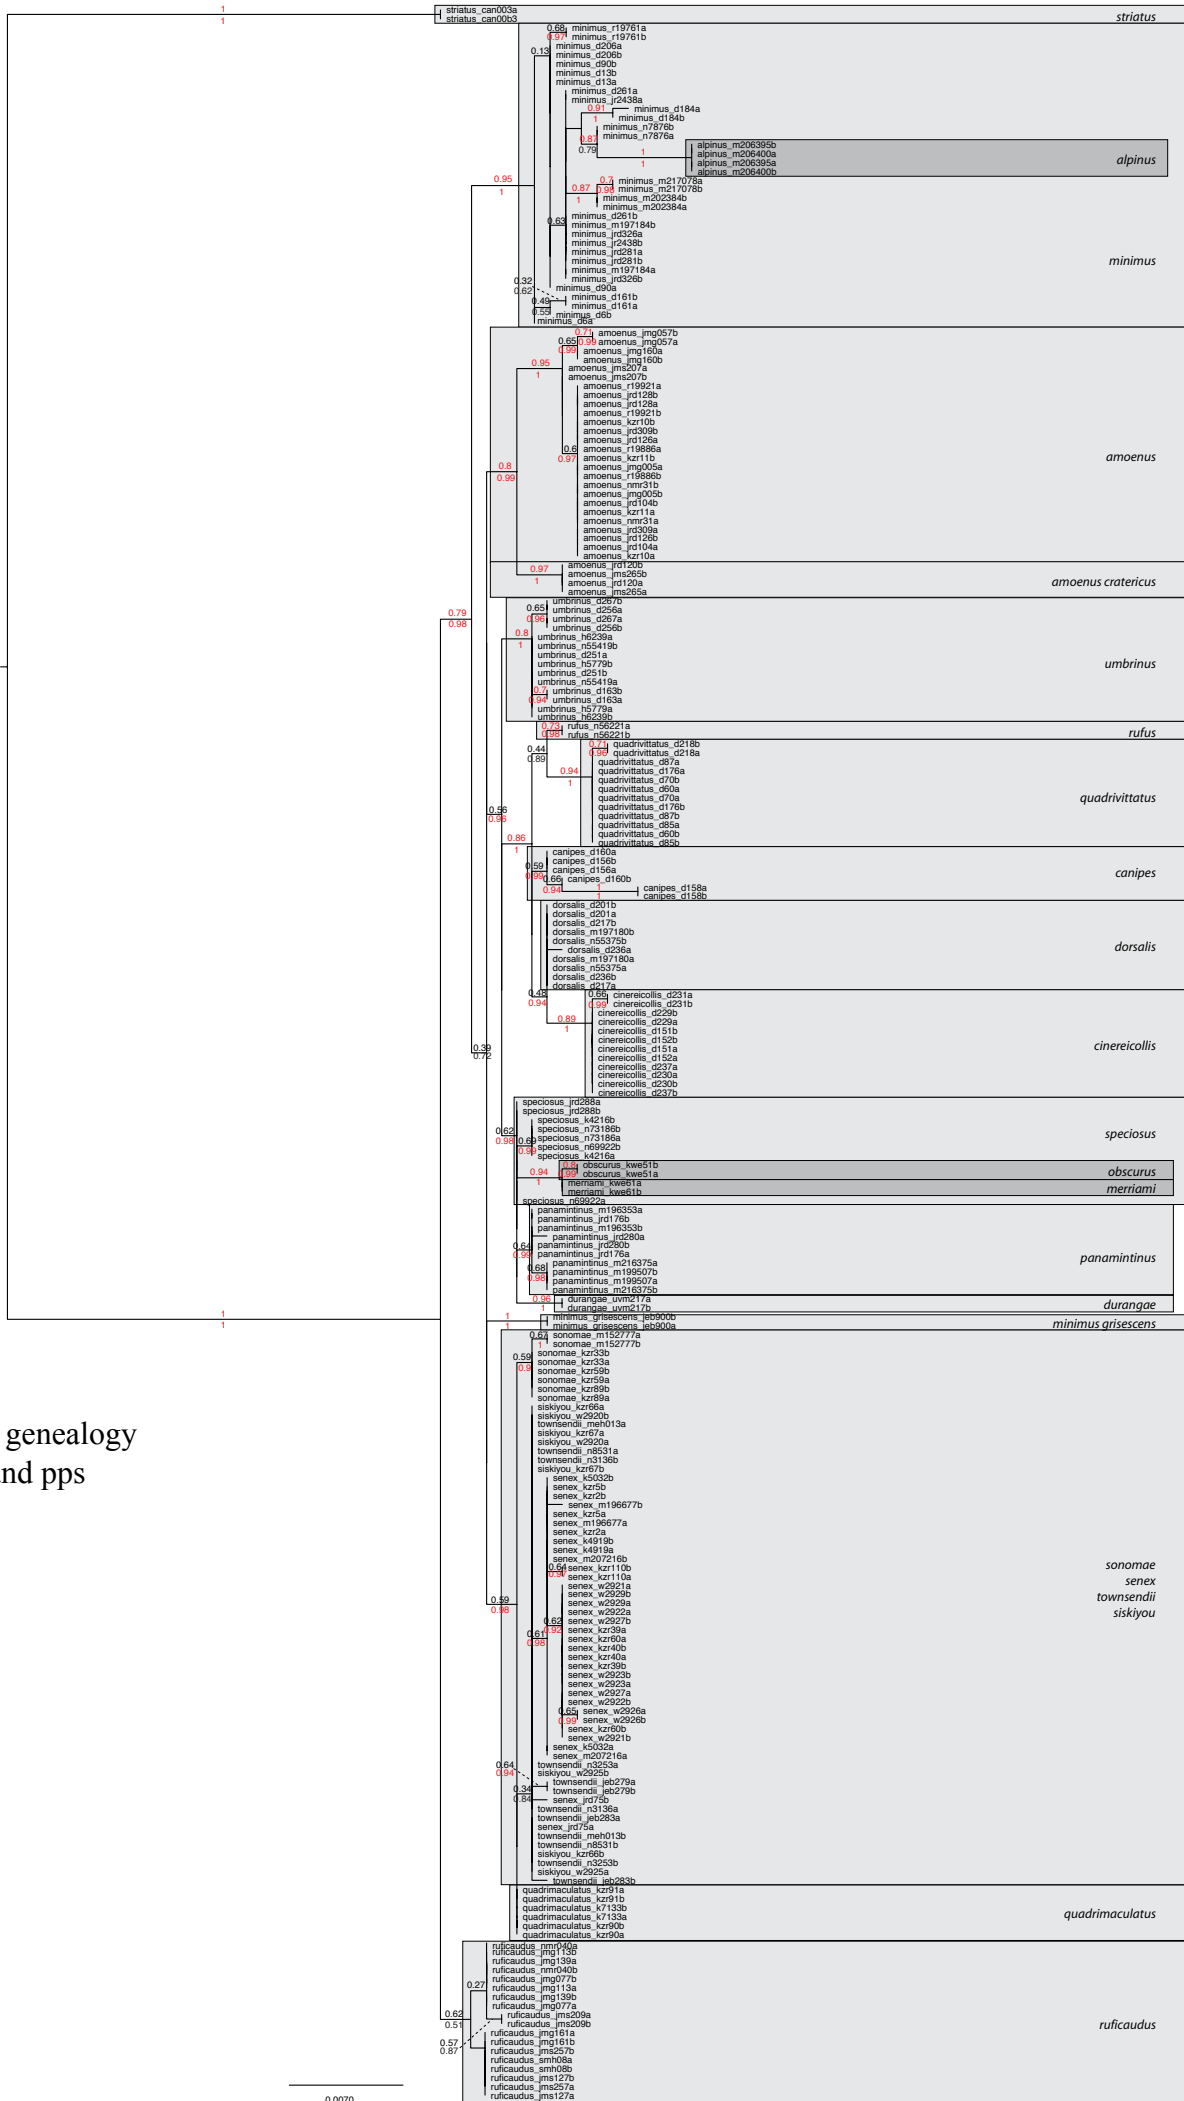

Figure S1. ACR ML genealogy with ML bootstraps and pps

Figure S2. ANON ML genealogy with ML bootstraps and pps

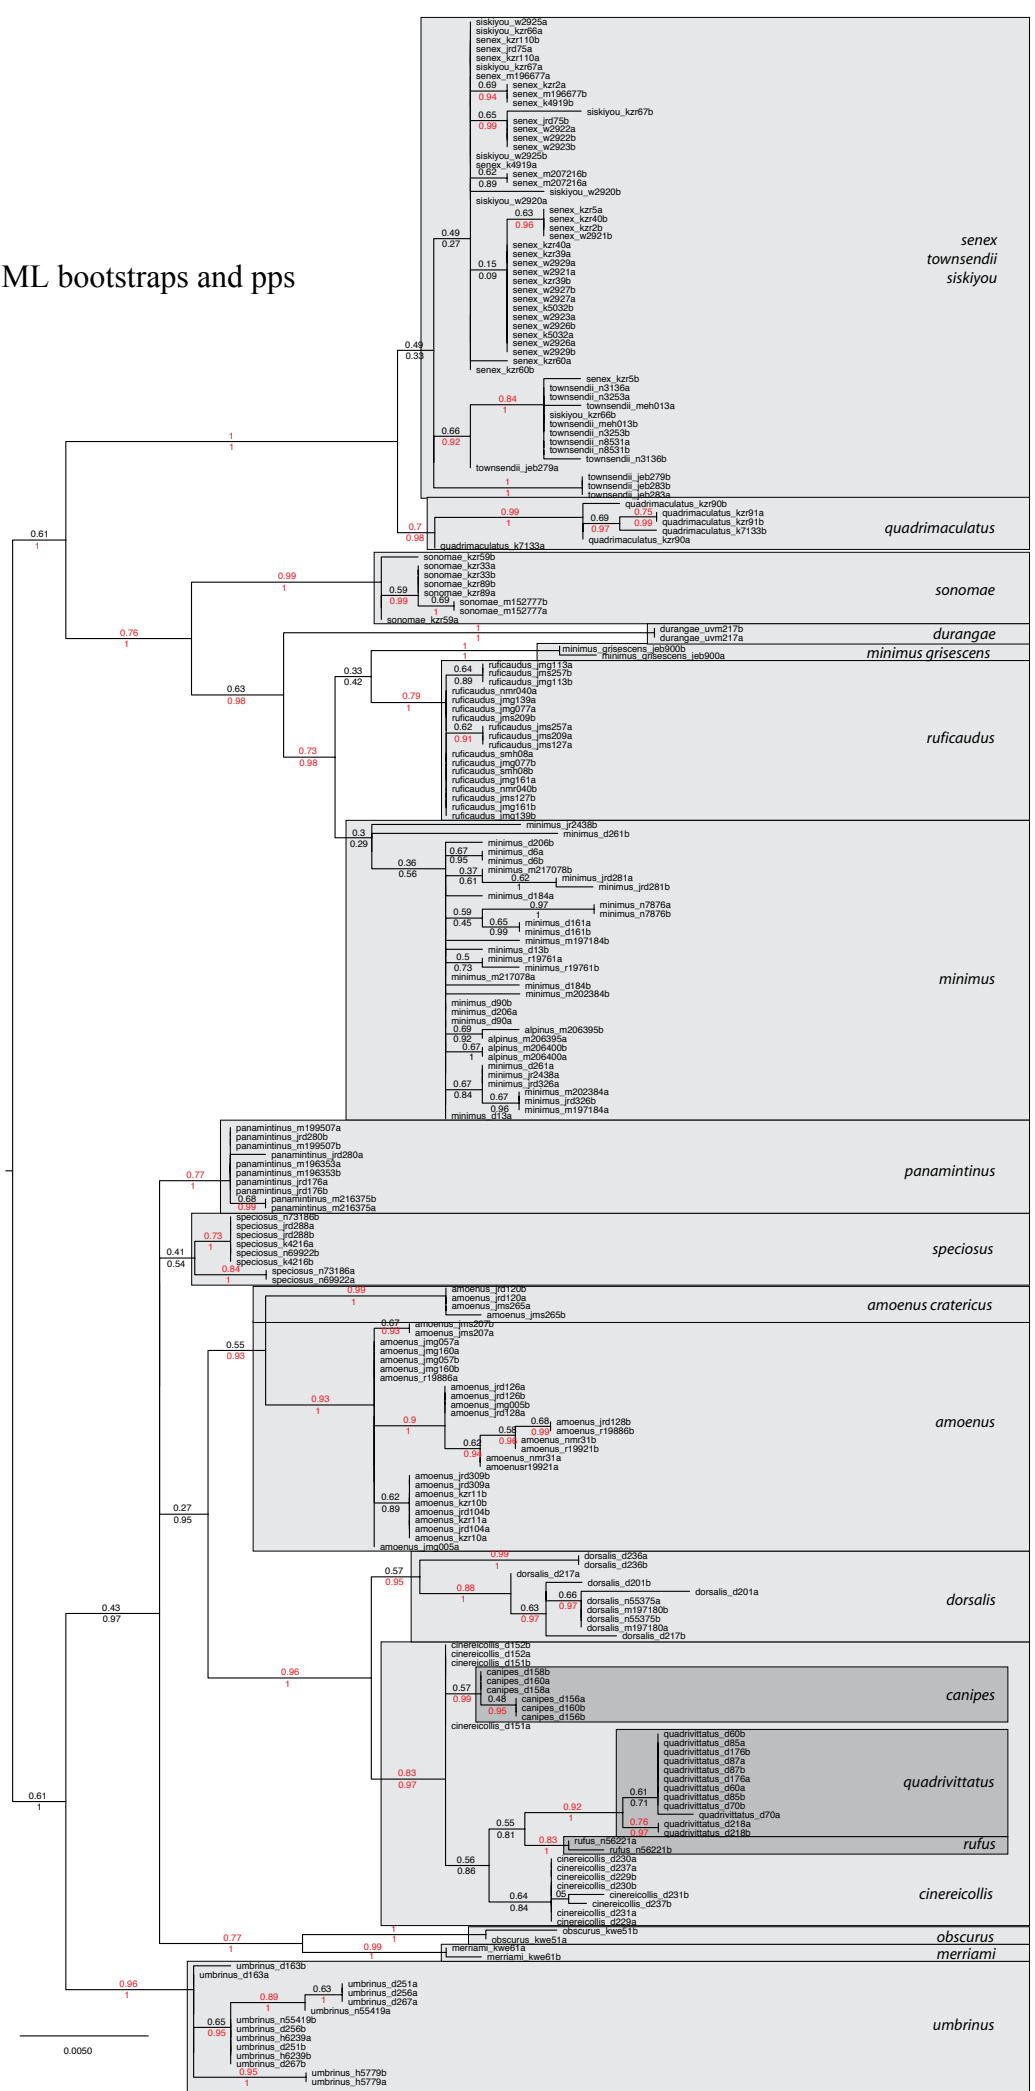



Figure S4. ZP2 ML genealogy with ML bootstraps and posterior probabilities

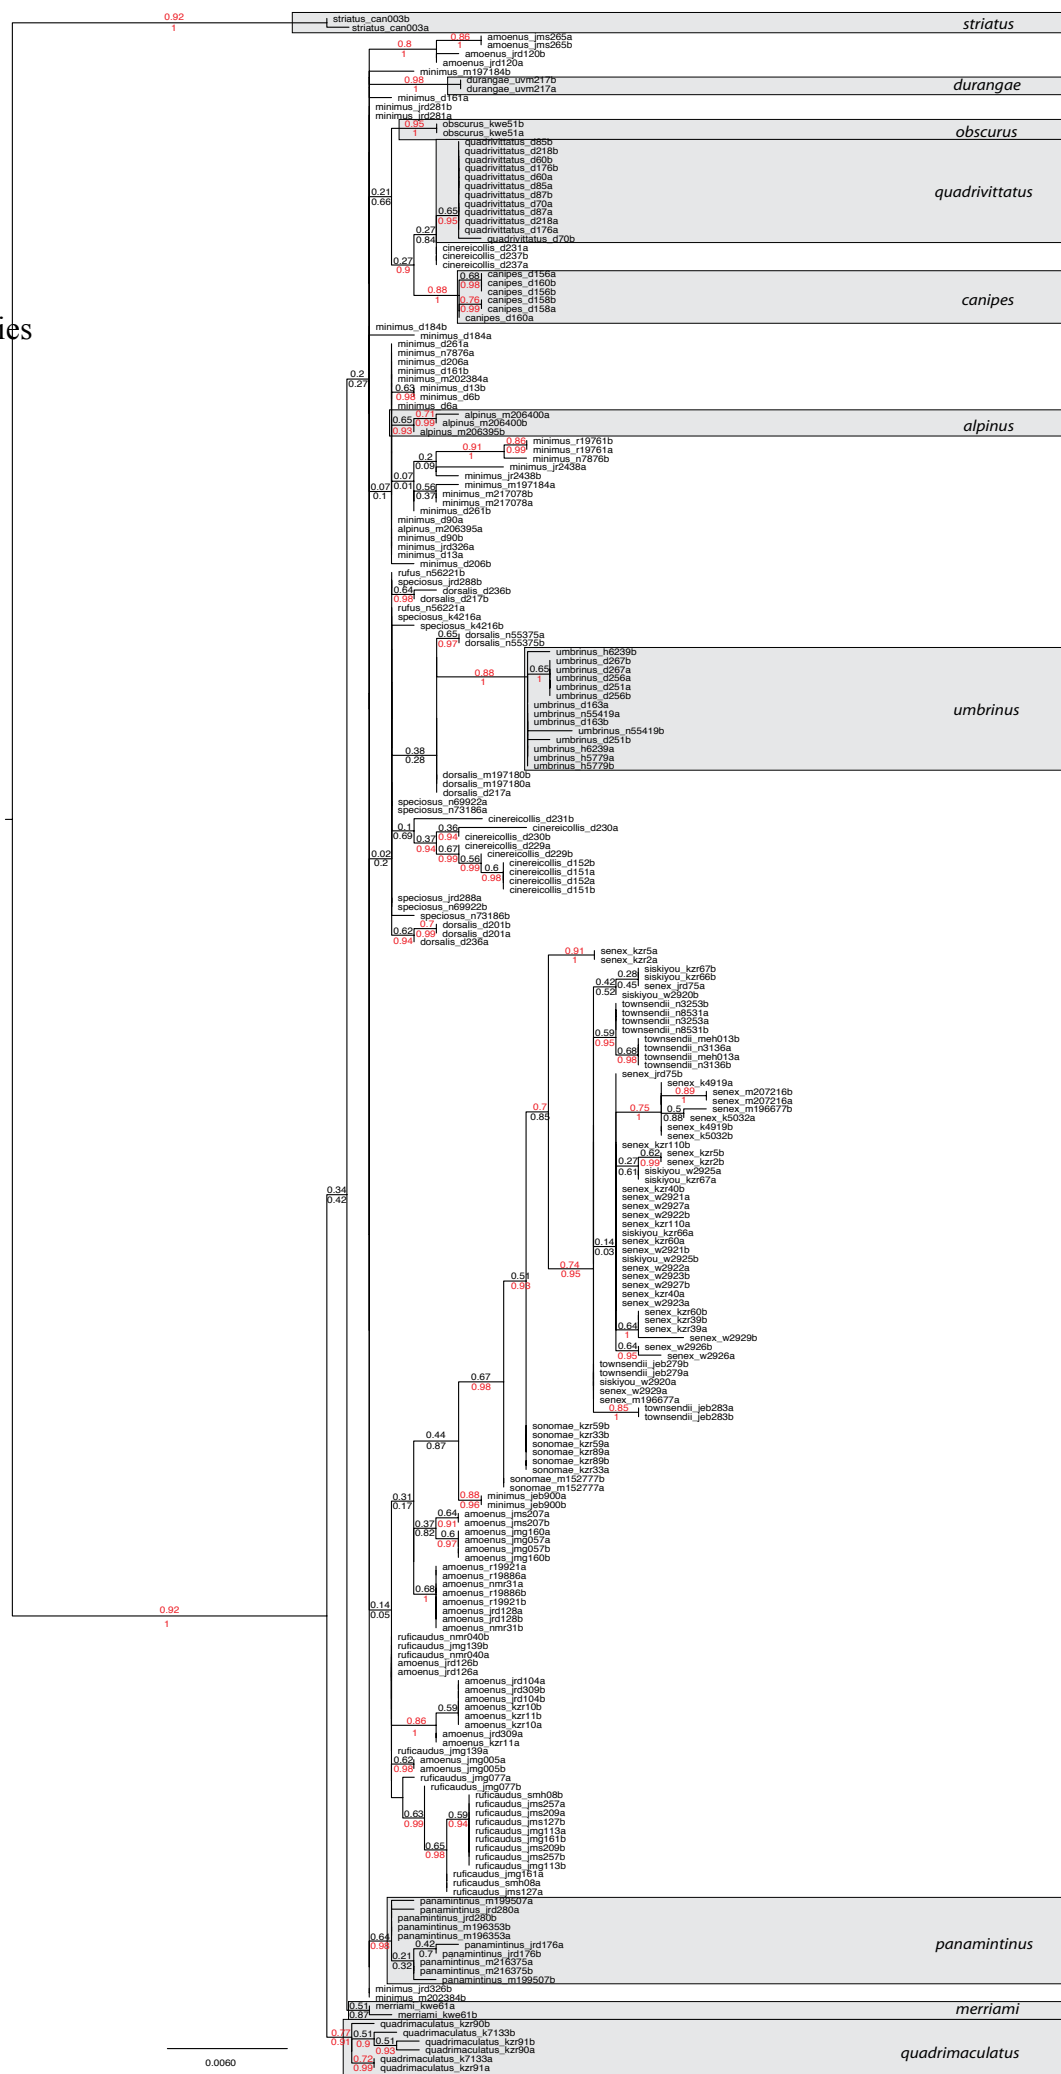

Figure S5. ML tree with bootstrap support of concatenated nuclear data with outgroup *T. striatus*

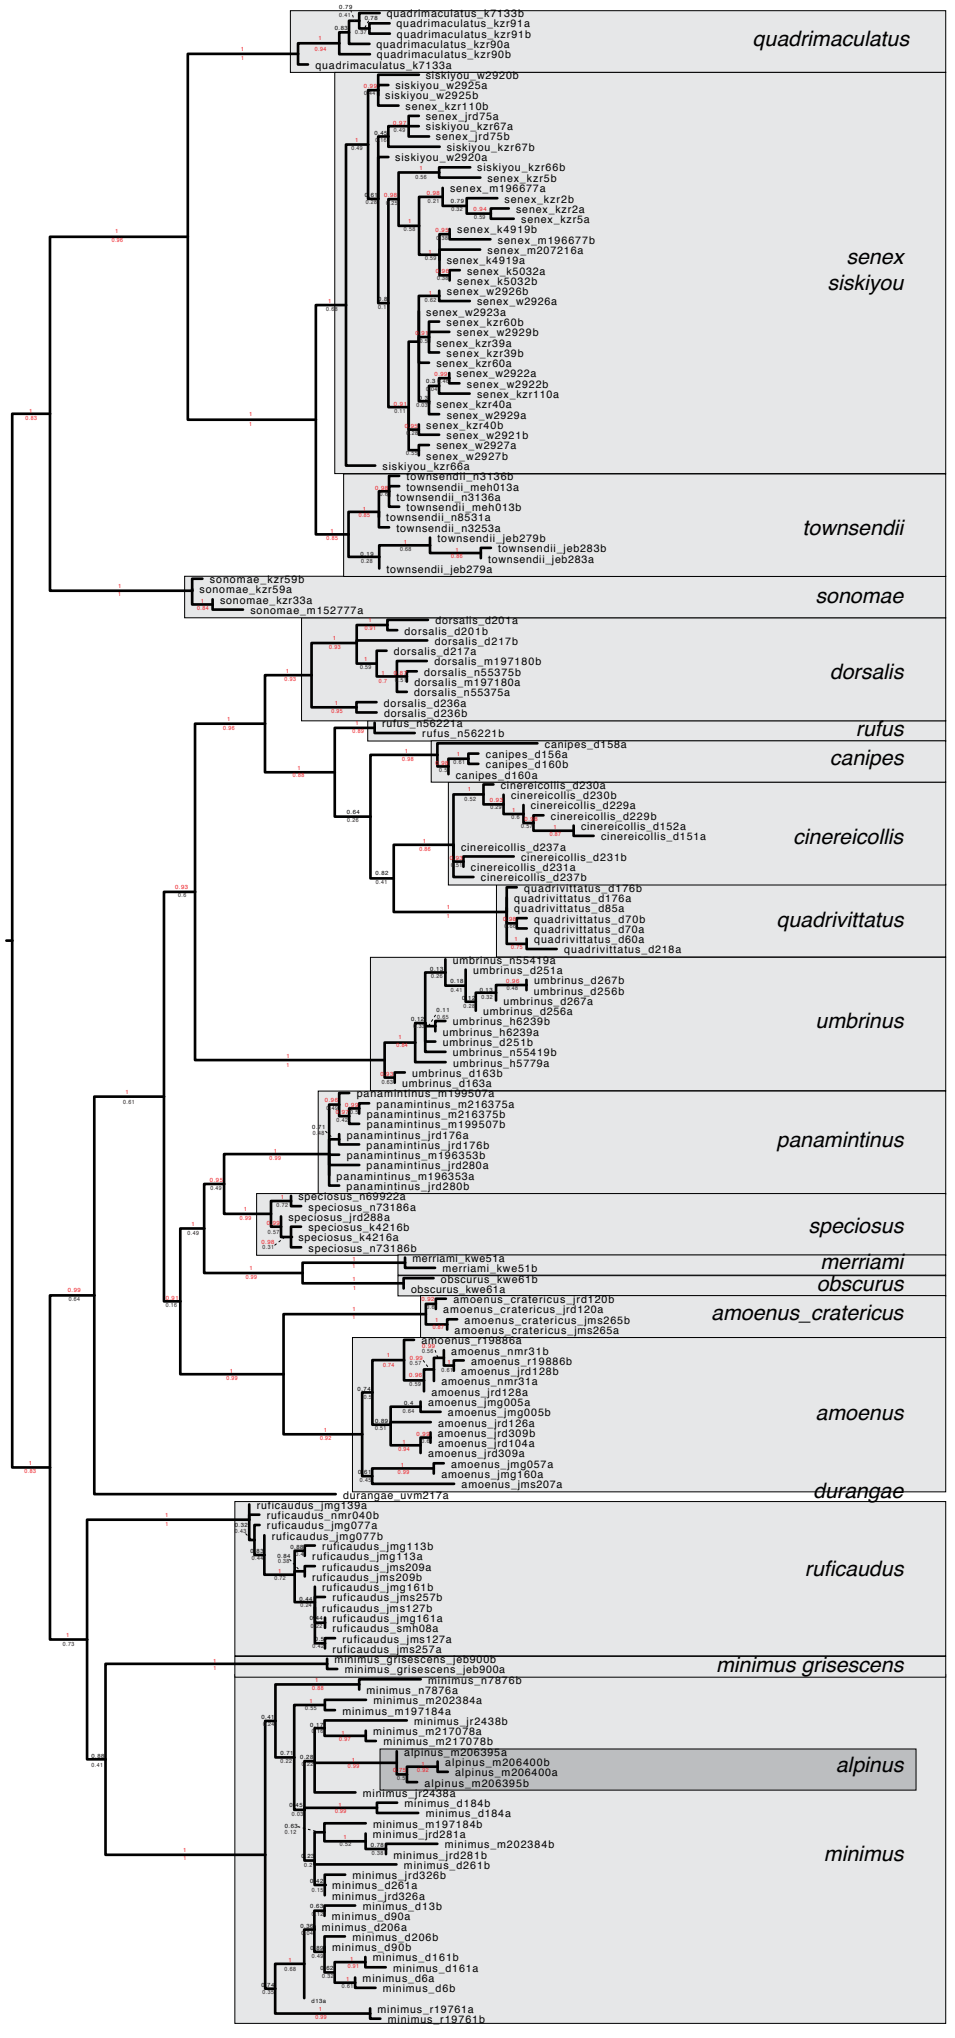



Figure S6. Maximum clade credibility tree from a \*BEAST run with all four nuclear loci.

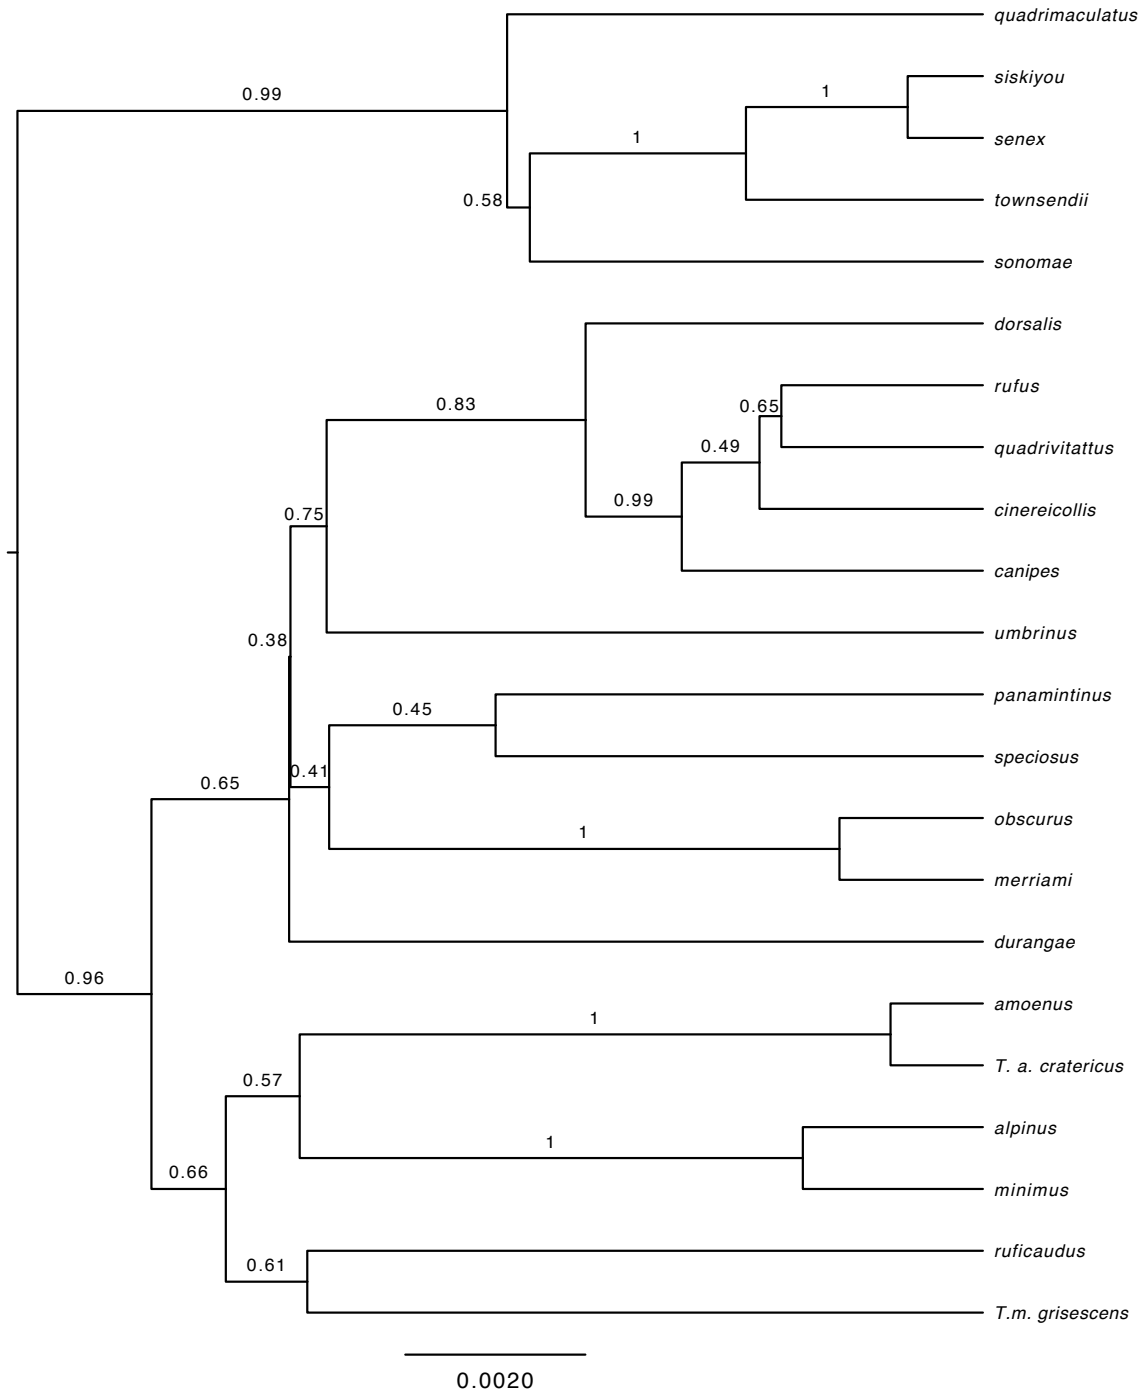

Figure S7. Maximum clade credibility tree from \*BEAST including mitochondrial Cytochrome *b* as well as the four nuclear loci. Numbers on branches are nodal posterior probabilities.

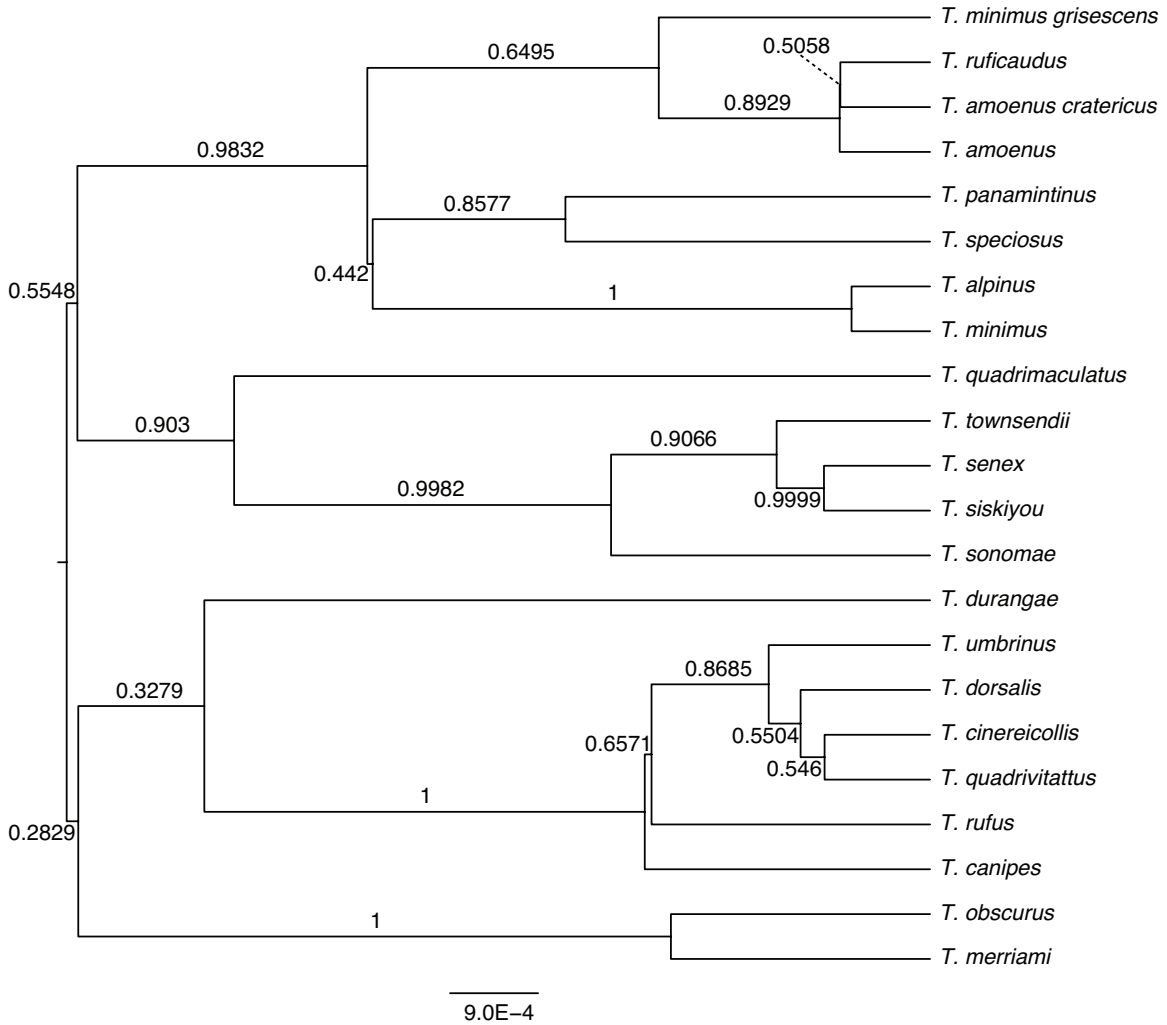

Supplement: supp_syr094_supplement.pdf [file supp_syr094_supplement.pdf]
